# Supplementary figures and images for: Crystal structure and fluxional behaviour in solution of [Rh4(CO)6(µ-Me2PCH2PMe2)3]Electronic supplementary information (ESI) available: regression of the Eyring plot of [Rh4(CO)6(µ-Me2PCH2PMe2)3] as measured by 13C–NMR between 169 and 293 K in CD2Cl2. 31P–NMR spectra of [Rh4(CO)6(µ-Me2PCH2PMe2)3] in CD2Cl2 at three different temperatures. See http://www.rsc.org/suppdata/dt/b2/b210986g/
Source: Royal Society of Chemistry journal article supplement (doi:10.1039/b210986g), 2003-02-05

**Supplementary material**

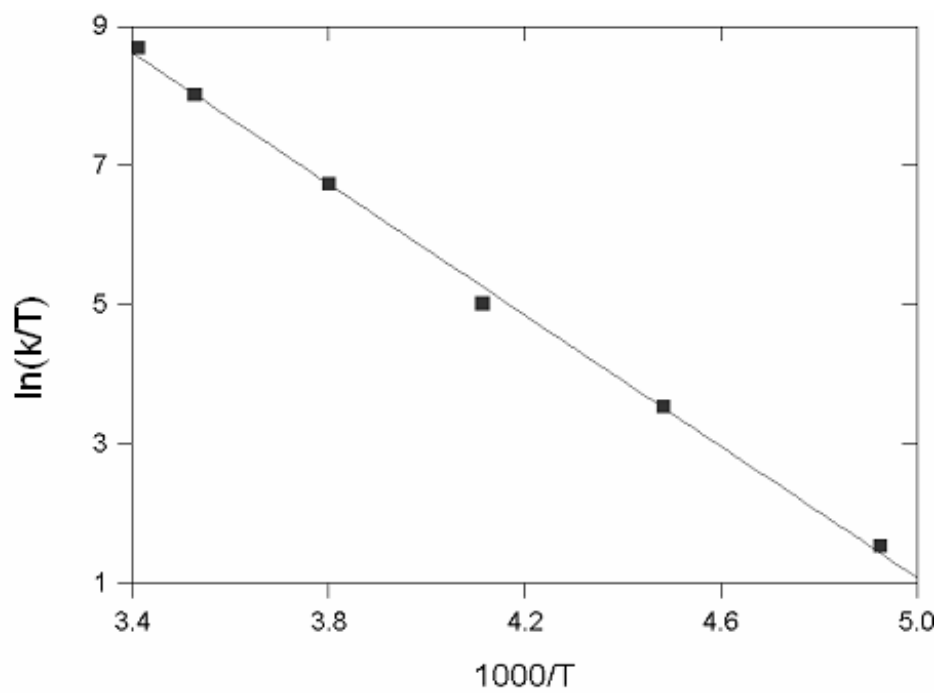

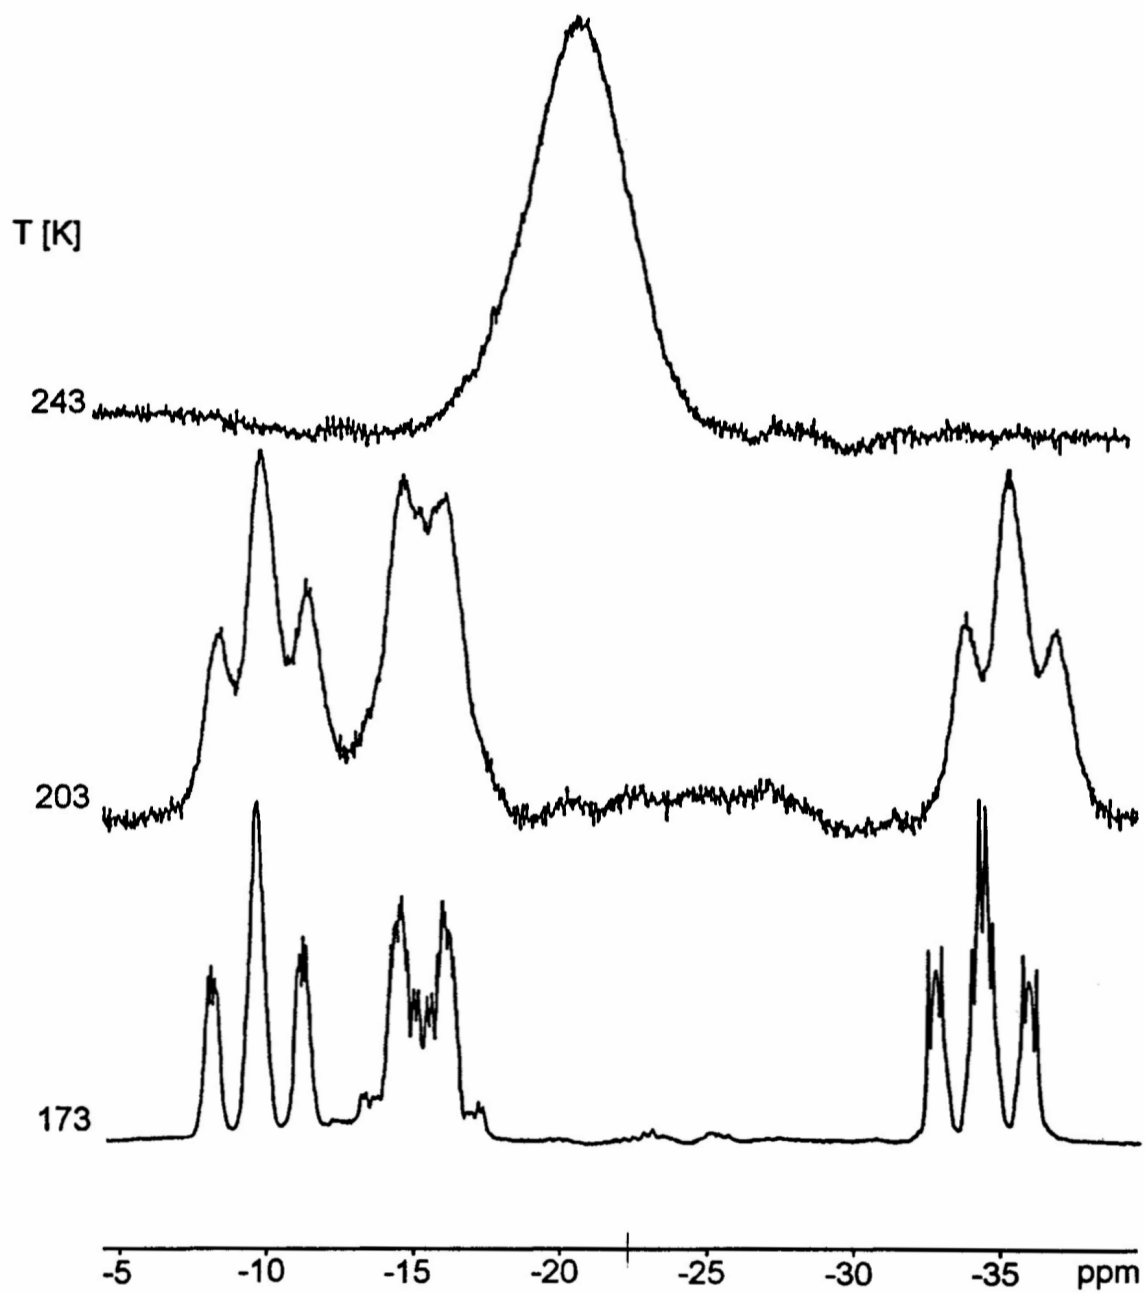

Supplement: b210986g.pdf [file b210986g.pdf]
